# Supplementary material
Source: HighWire-hosted journal article supplement (https://bjsm.bmj.com/content/55/2/118)
Supplement: inline-supplementary-material-2 [file inline-supplementary-material-2.pdf]

| Article | Title                                        | Topic_area     | Stats_co | Department_type  |
|---------|----------------------------------------------|----------------|----------|------------------|
| 157     | A multilevel hypernetworks approach          | Sport/Exercise | 1        | Computer Science |
| 369     | Acute Effects of Citrulline Supplement       | Sport/Exercise | 1        | Biostatistics    |
| 611     | Anterior cruciate ligament injury risk       | Medicine       | 1        | Epidemiology     |
| 808     | Association of Dynamic Balance With          | Sport/Exercise | 1        | Biostatistics    |
| 809     | Association of high amounts of physical      | Sport/Exercise | 1        | Data Science     |
| 813     | Association of Race and Ethnicity with       | Medicine       | 1        | Data Science     |
| 1222    | Change in physical activity from adolescence | Sport/Exercise | 1        | Epidemiology     |
| 1404    | Combined total hip and knee arthroplasty     | Medicine       | 1        | Epidemiology     |
| 1614    | Controlled ecological evaluation of a        | Sport/Exercise | 1        | Epidemiology     |
| 1955    | Depression and Non-modifiable Physical       | Medicine       | 1        | Biostatistics    |
| 2170    | Do the associations of sedentary behaviour   | Sport/Exercise | 1        | Biostatistics    |
| 2207    | Does early anterior cruciate ligament        | Medicine       | 1        | Epidemiology     |
| 2286    | Drain Use is Associated with Increased       | Medicine       | 1        | Epidemiology     |
| 2303    | Dynamic balance performance varies           | Sport/Exercise | 1        | Data Science     |
| 2327    | Early Intervention Service Intensity and     | Rehab          | 1        | Data science     |
| 2452    | Effect of Modified Japanese Orthopaedic      | Medicine       | 1        | Biostatistics    |
| 2476    | Effect of Stacked Sodium Bicarbonate         | Sport/Exercise | 1        | Math             |
| 2505    | Effectiveness of Exercise Intervention       | Rehab          | 1        | Epidemiology     |
| 2757    | Elite sport policies and international       | Sport/Exercise | 1        | Economics        |
| 2776    | Employment Stability in the First 5 Years    | Rehab          | 1        | Epidemiology     |
| 2823    | Epidemiology of secondary school bullying    | Sport/Exercise | 1        | Epidemiology     |
| 3037    | Factors predictive of Cutibacterium          | Medicine       | 1        | Statistics       |
| 3231    | Gait Mechanics and T1 $\rho$ MRI of Tibial   | Medicine       | 1        | Biostatistics    |
| 3336    | Health Care Costs and Opioid Use After       | Rehab          | 1        | Economics        |
| 3343    | Health-related Outcomes after a Year         | Medicine       | 1        | Epidemiology     |
| 3488    | How does exercise treatment compare          | Medicine       | 1        | Epidemiology     |
| 3738    | Increased Proportion of Fusion Surgery       | Medicine       | 1        | Biostatistics    |
| 3827    | Initial Provider Specialty Is Associated     | Rehab          | 1        | Epidemiology     |
| 4470    | Mediating Effect of Muscle on the Risk       | Sport/Exercise | 1        | Epidemiology     |
| 4518    | Metabolic profiling of elite athletes        | Sport/Exercise | 1        | Computer Science |
| 4752    | Natural Language Processing for the          | Medicine       | 1        | Economics        |
| 4916    | Oestrogen replacement improves bone          | Sport/Exercise | 1        | Biostatistics    |
| 4999    | Organised and non-organised after-school     | Sport/Exercise | 1        | Economics        |
| 5891    | Rehabilitation predictors of clinical        | Medicine       | 1        | Biostatistics    |
| 6811    | The association of grip strength with        | Sport/Exercise | 1        | Epidemiology     |
| 7115    | The incidence, prevalence, nature, and       | Sport/Exercise | 1        | Epidemiology     |
| 7202    | The national football league combination     | Sport/Exercise | 1        | Math             |
| 7538    | Total volume of cam deformity alone          | Medicine       | 1        | Statistics       |
| 8045    | Where to go: Computational and visualization | Sport/Exercise | 1        | Computer Science |
| 8081    | Wrist-specific accelerometry methodology     | Sport/Exercise | 1        | Data Science     |
| 1073    | 'Bundle busters' who is at risk of           | exc            | 0        | Medicine         |
| 50      | 8-Week Basic Military Training Improves      | Sport/Exercise | 0        | Medicine         |
| 65      | A biomechanical cadaveric study of           | Medicine       | 0        | Medicine         |
| 84      | A combined procedure with Bereiter           | Medicine       | 0        | Medicine         |
| 138     | A Meta-Analysis of Plyometric Training       | Sport/Exercise | 0        | Medicine         |
| 199     | A proposal for a new classification of       | Medicine       | 0        | Medicine         |

|                                                                 |                |   |
|-----------------------------------------------------------------|----------------|---|
| 272 A threshold value of 3.5 mm of passi                        | Medicine       | 0 |
| 341 Active Recovery Induces Greater Enc                         | Sport/Exercise | 0 |
| 370 Acute Effects of Constant-Angle and                         | Sport/Exercise | 0 |
| 377 Acute effects of very low-volume hig                        | Sport/Exercise | 0 |
| 417 Adductor Canal Block Versus Femor                           | Medicine       | 0 |
| 431 Advanced Age Redistributes Positive                         | Sport/Exercise | 0 |
| 454 Aerobic training status does not atte                       | Sport/Exercise | 0 |
| 461 Age at Time of Surgery but Not Sex I                        | Medicine       | 0 |
| 508 Altered movement strategies during                          | Sport/Exercise | 0 |
| 562 Analysis of foot strike pattern, rearf                      | Sport/Exercise | 0 |
| 565 Analysis of Return to Sport and Wei                         | Medicine       | 0 |
| 583 Anatomical rectangular tunnels iden                         | Medicine       | 0 |
| 733 Arthroscopic Rotator Cuff Repair Wi                         | Medicine       | 0 |
| 774 Assessment of Association Between                           | Medicine       | 0 |
| 779 Assessment of Na <sup>+</sup> /K <sup>+</sup> ATPase Activi | Sport/Exercise | 0 |
| 787 Association between deoxygenated                            | Sport/Exercise | 0 |
| 825 Associations Between Insurance Pro                          | Rehab          | 0 |
| 833 Associations of object control motor                        | Sport/Exercise | 0 |
| 884 Average acceleration and intensity g                        | Sport/Exercise | 0 |
| 892 Bacterial biofilm formation is variabl                      | Medicine       | 0 |
| 982 Biomechanics of lower trapezius anc                         | Sport/Exercise | 0 |
| 1114 Can some early revision total hip art                      | Medicine       | 0 |
| 1119 Can the neck contribute to persisten                       | Medicine       | 0 |
| 1132 Carbohydrate oxidation and glucose                         | Sport/Exercise | 0 |
| 1137 Cardiac parasympathetic and anaerc                         | Sport/Exercise | 0 |
| 1145 Cardiometabolic Response to a Singl                        | Sport/Exercise | 0 |
| 1152 Cardiorespiratory and muscular fitne                       | Sport/Exercise | 0 |
| 1177 Cartilage Restoration Surgery: Incide                      | Medicine       | 0 |
| 1188 Celecoxib cannot inhibit the progres                       | Medicine       | 0 |
| 1203 Cervical Alignment of Anterior Cervi                       | Medicine       | 0 |
| 1205 Cervical spinal 5-HT2A and 5-HT2B r                        | Sport/Exercise | 0 |
| 1229 Changes in Body Composition and N                          | Sport/Exercise | 0 |
| 1231 Changes in cerebral oxygen saturatic                       | Sport/Exercise | 0 |
| 1264 Characterization of bone ingrowth a                        | Medicine       | 0 |
| 1286 Chronic anterior tibial stress fractur                     | Medicine       | 0 |
| 1319 Clinical and radiographic outcomes                         | Medicine       | 0 |
| 1348 Clinical Outcomes and Predictive Fac                       | Medicine       | 0 |
| 1350 Clinical outcomes following reverse                        | Medicine       | 0 |
| 1360 Closed Wound Subfascial Suction Dr                         | Medicine       | 0 |
| 1431 Comparative Effectiveness of Cartila                       | Medicine       | 0 |
| 1459 Comparison between cuff-based anc                          | Sport/Exercise | 0 |
| 1464 Comparison of a Vitamin E-infused h                        | Medicine       | 0 |
| 1493 Comparison of patient-reported out                         | Medicine       | 0 |
| 1497 Comparison of Postoperative Outco                          | Medicine       | 0 |
| 1504 Comparison of reduced-volume high                          | Sport/Exercise | 0 |
| 1624 Coper Classification Early After Ante                      | Medicine       | 0 |
| 1840 Criterion-related validity of self-repc                    | Rehab          | 0 |

|      |                                         |                |   |
|------|-----------------------------------------|----------------|---|
| 1852 | Cross-education does not improve e      | Medicine       | 0 |
| 1887 | Cutibacterium acnes in primary reve     | Medicine       | 0 |
| 1960 | Dermal Calcium Loss Is Not the Prim     | Sport/Exercise | 0 |
| 2021 | Development of the glenohumeral jr      | Medicine       | 0 |
| 2053 | Differences in case mix and outcom      | Medicine       | 0 |
| 2086 | Directional aiming bias in golf putt    | Sport/Exercise | 0 |
| 2100 | Displaced humeral surgical neck frac    | Medicine       | 0 |
| 2101 | Displaced medial end clavicular frac    | Medicine       | 0 |
| 2109 | Distal tuberosity osteotomy in open     | Medicine       | 0 |
| 2143 | Do habitual foot-strike patterns in r   | Sport/Exercise | 0 |
| 2226 | Does Medicaid expansion improve a       | Medicine       | 0 |
| 2228 | Does MRI add value in general pract     | Medicine       | 0 |
| 2277 | Dose–response relationship of inter     | Sport/Exercise | 0 |
| 2331 | Early Mechanical Failure of a Tumor     | Medicine       | 0 |
| 2336 | Early outcomes of locked noncemen       | Medicine       | 0 |
| 2386 | Effect of asthma and six-months hig     | Sport/Exercise | 0 |
| 2408 | Effect of different doses of supervis   | Sport/Exercise | 0 |
| 2442 | Effect of ischemic preconditioning a    | Sport/Exercise | 0 |
| 2457 | Effect of Penalty Minute Rule Chang     | Sport/Exercise | 0 |
| 2483 | Effect of training load distribution or | Sport/Exercise | 0 |
| 2544 | Effects of antisocial behaviour on op   | Sport/Exercise | 0 |
| 2554 | Effects of caffeine and sex on muscl    | Sport/Exercise | 0 |
| 2567 | Effects of combined resistance traini   | Sport/Exercise | 0 |
| 2632 | Effects of mental fatigue on exercise   | Sport/Exercise | 0 |
| 2637 | Effects of Napping on Alertness, Cog    | Sport/Exercise | 0 |
| 2651 | Effects of Playing Surface on Physica   | Sport/Exercise | 0 |
| 2652 | Effects of plyometric and directional   | Sport/Exercise | 0 |
| 2664 | Effects of Relative Drop Heights of D   | Sport/Exercise | 0 |
| 2722 | Efficacy of suprascapular nerve bloc    | Medicine       | 0 |
| 2753 | Elite athletes as research model: vit   | Sport/Exercise | 0 |
| 2764 | Emergency action planning in secon      | Sport/Exercise | 0 |
| 2824 | Epidemiology of Shoulder Surgery A      | Medicine       | 0 |
| 2873 | Evaluating the impact of a coach dev    | Sport/Exercise | 0 |
| 2876 | Evaluation of a 3D-printed total kne    | Medicine       | 0 |
| 2879 | Evaluation of an In-Ear Sensor for Q    | Sport/Exercise | 0 |
| 2949 | Exercise prevents the adverse effect    | Sport/Exercise | 0 |
| 2952 | Exercise Therapy in Addition to an O    | Sport/Exercise | 0 |
| 2974 | Exercise-Mobilized Platelet-Rich Pla    | Medicine       | 0 |
| 3013 | Facilitators to support the implemer    | Sport/Exercise | 0 |
| 3050 | Fan response to the identity threat     | Sport/Exercise | 0 |
| 3085 | Female rugby union injuries in New      | Sport/Exercise | 0 |
| 3088 | Femoral Bone Remodeling in Revisic      | Medicine       | 0 |
| 3096 | Femoral tunnel widening is similar      | Medicine       | 0 |
| 3101 | Fiber Type Composition and Rate of      | Sport/Exercise | 0 |
| 3103 | Fibre-type-specific and Mitochondri     | Sport/Exercise | 0 |
| 3114 | Financial incentives for physical acti  | Sport/Exercise | 0 |
| 3126 | Fitness, knee function and competi      | Medicine       | 0 |

|                                                      |                |   |
|------------------------------------------------------|----------------|---|
| 3135 Flexible reamers create comparable              | Medicine       | 0 |
| 3218 Functional Resistance Training and A            | Sport/Exercise | 0 |
| 3221 Fungal prosthetic joint infection in tr         | Medicine       | 0 |
| 3226 Gait after Birmingham hip resurfacing           | Medicine       | 0 |
| 3246 Generalized joint hypermobility does            | Medicine       | 0 |
| 3284 Goal-directed self-talk used to self-r          | Sport/Exercise | 0 |
| 3314 Halo Gravity Traction Can Mitigate P            | Medicine       | 0 |
| 3351 Heart-rate variability in elite synchron        | Sport/Exercise | 0 |
| 3373 High knee loading in male adolescents           | Sport/Exercise | 0 |
| 3519 Hybrid growing rod technique of oste            | Medicine       | 0 |
| 3528 Hypotensive Effect of Heated Water              | Sport/Exercise | 0 |
| 3535 Iatrogenic Medial Collateral Ligament           | Medicine       | 0 |
| 3606 Impact of sports participation on mental        | Sport/Exercise | 0 |
| 3622 Impairment-based rehabilitation with            | Sport/Exercise | 0 |
| 3652 Improvement in Back and Leg Pain after          | Medicine       | 0 |
| 3690 In vivo blood metal ion levels in patients      | Medicine       | 0 |
| 3700 Inadequate Postoperative Energy Intake          | Medicine       | 0 |
| 3751 Increasing Numbers of Shoulder Coracocl         | Medicine       | 0 |
| 3765 Individual and Combined Effect of Intra         | Sport/Exercise | 0 |
| 3775 Individuals with and without low back           | Rehab          | 0 |
| 3806 Influence of Peer-led Wheelchair Training       | Sport/Exercise | 0 |
| 3812 Influence of Risky Pathoanatomy on              | Medicine       | 0 |
| 3817 Influence of the "slingshot" bench press        | Sport/Exercise | 0 |
| 3856 Inspiratory muscle training effects on          | Sport/Exercise | 0 |
| 3940 Intrawound vancomycin powder incorporation      | Medicine       | 0 |
| 3957 Ionotropic and metabotropic kainate             | Sport/Exercise | 0 |
| 3991 Is Lateral Posterior Tibial Slope Correction    | Medicine       | 0 |
| 3993 Is Microfracture Necessary? Acetabular          | Medicine       | 0 |
| 4049 Isometric resistance training increases         | Sport/Exercise | 0 |
| 4095 Kinematic alignment in total knee arthro        | Medicine       | 0 |
| 4151 Left atrial volume in elite athletes: A         | Sport/Exercise | 0 |
| 4154 Leg- vs arm-cycling repeated sprints            | Sport/Exercise | 0 |
| 4169 Letting the cat out of the bag: Athlete         | Sport/Exercise | 0 |
| 4201 Load imbalances existed as determinants         | Medicine       | 0 |
| 4268 Long-Term Results of a 2-Stage Exchange         | Medicine       | 0 |
| 4277 Long-term results of tripolar constrained       | Medicine       | 0 |
| 4237 Longitudinal trajectories of emotion            | Sport/Exercise | 0 |
| 4301 Low predictive power of comorbidity             | Medicine       | 0 |
| 4388 Market reactions to sport sponsorship           | Sport/Exercise | 0 |
| 4395 Match-related time course of perceived          | Sport/Exercise | 0 |
| 4414 Maximum Walking Speed at Discharge              | Rehab          | 0 |
| 4465 Medial Unicompartamental Knee Arthro            | Medicine       | 0 |
| 4516 Metabolic Implications of Diet and Exercise     | Sport/Exercise | 0 |
| 4546 Midshaft Clavicle Fractures: Surgery            | Medicine       | 0 |
| 4611 Modic Changes Are Not Associated with           | Rehab          | 0 |
| 4634 Monitoring workload in elite female             | Sport/Exercise | 0 |
| 4657 Motivation for sports participation, individual | Sport/Exercise | 0 |

|      |                                                    |   |
|------|----------------------------------------------------|---|
| 4708 | Muscle Activity Pattern Dysfunction Sport/Exercise | 0 |
| 4803 | Ninety-day complications following t               | 0 |
| 4820 | No Difference in Outcomes Detecte                  | 0 |
| 4834 | No ergogenic effects of a 10-day cor               | 0 |
| 4901 | Nutritional supplementation boosts                 | 0 |
| 4905 | Obesity should not be considered a                 | 0 |
| 4919 | Old and exciting? Sport sponsorship                | 0 |
| 4938 | One week of magnesium supplemer                    | 0 |
| 4977 | Opioid-Limiting Regulation: Effect or              | 0 |
| 5001 | Origins, Courses, and Distributions o              | 0 |
| 5055 | Outcomes of repeat two-stage exch                  | 0 |
| 5173 | Patient-specific high-tibial osteotom              | 0 |
| 5163 | Patients With Borderline Hip Dyspla                | 0 |
| 5177 | Patterns in Outcomes Reporting of C                | 0 |
| 5182 | Peak oxygen uptake cut-points to id                | 0 |
| 5208 | Perceptions of coach doping confror                | 0 |
| 5213 | Percutaneous fixation with Kirschne                | 0 |
| 5234 | Perineal Pressure during Hip Arthros               | 0 |
| 5239 | Perioperative Catheter Use as a Risk               | 0 |
| 5287 | Physical Activity and Sedentary Time               | 0 |
| 5322 | Physical function in older adults: Im              | 0 |
| 5351 | Physiological Responses to Exercise                | 0 |
| 5366 | Placental oxygen transfer reduces h                | 0 |
| 5410 | Posterior cruciate ligament resectio               | 0 |
| 5418 | Posterior tibial slope angle is associa            | 0 |
| 5478 | Predicting dynamic balance improve                 | 0 |
| 5483 | Predicting on-ice skating using labor              | 0 |
| 5500 | Prediction of upper extremity peak                 | 0 |
| 5503 | Predictive factors for developing ost              | 0 |
| 5558 | Preoperative sagittal spinal profile o             | 0 |
| 5576 | Presence of Spotters Improves Benc                 | 0 |
| 5599 | Prevalence of knee osteoarthritis fe               | 0 |
| 5600 | Prevalence of objectively measured                 | 0 |
| 5612 | Primary ACL reconstruction using th                | 0 |
| 5690 | Protein composition of the muscle n                | 0 |
| 5695 | Proven accuracy for a new dynamic                  | 0 |
| 5705 | Psychological characteristics of deve              | 0 |
| 5735 | Quadriceps Impairment Is Associate                 | 0 |
| 5742 | Quality of Life in Males and Females               | 0 |
| 5756 | Quantitative Correction of Cervical S              | 0 |
| 5758 | Quantitative risk factor analysis of p             | 0 |
| 5825 | Recommending goals and supportin                   | 0 |
| 5876 | Regional Lymph Node Involvement I                  | 0 |
| 5877 | Regional or General Anesthesia in th               | 0 |
| 5922 | Relationship of Activity Patterns to               | 0 |
| 5936 | Relative Age Effect in Collegiate Soc              | 0 |
| 5939 | Release of the medial collateral ligar             | 0 |

|                                                             |   |
|-------------------------------------------------------------|---|
| 5987 Repetitive Head Impacts in Football Sport/Exercise     | 0 |
| 6032 Respiratory Complications after Post Sport/Exercise    | 0 |
| 6059 Retrospective, nonrandomized anal Medicine             | 0 |
| 6062 Return to Dance and Predictors of O Medicine           | 0 |
| 6067 Return to Play and Long-term Partici Medicine          | 0 |
| 6079 Return to Work Following High Tibia Medicine           | 0 |
| 6164 Role of zebrafish CIC-K/barttin chanr Sport/Exercise   | 0 |
| 6235 Sedentary behavior in everyday life Sport/Exercise     | 0 |
| 6254 Self-reported physical activity level c Sport/Exercise | 0 |
| 6319 Shoe-mounted accelerometers shou Sport/Exercise        | 0 |
| 6323 Shortening of airway smooth muscle Sport/Exercise      | 0 |
| 6377 Single- Versus Double-Row Repair of Medicine           | 0 |
| 6384 Single-nucleotide-polymorphism-pai Sport/Exercise      | 0 |
| 6388 SIRT1 overexpression attenuates off Sport/Exercise     | 0 |
| 6421 Small fish, big pond: The role of heal Sport/Exercise  | 0 |
| 6433 Sniffing behaviour-related changes in Sport/Exercise   | 0 |
| 6475 Spinal injury analysis for typical snow Medicine       | 0 |
| 6482 Spontaneous cardiac baroreflex sens Sport/Exercise     | 0 |
| 6545 Steep lateral tibial slope and lateral- Medicine       | 0 |
| 6549 Stem Cell-Conditioned Medium Pro Medicine              | 0 |
| 6550 Step Activity after Surgical Treatmer Sport/Exercise   | 0 |
| 6646 Surgical treatment of Vancouver typ Medicine           | 0 |
| 6655 Suspended Push-up Training Augme Sport/Exercise        | 0 |
| 6700 Tandem gait test-retest reliability an Sport/Exercise  | 0 |
| 6741 Ten-year Longitudinal Follow-up MR Medicine            | 0 |
| 6824 The biomechanical difference betwe Medicine            | 0 |
| 6851 The complexity of bony malalignme Medicine             | 0 |
| 6878 The Development of a New Comput Rehab                  | 0 |
| 6910 The effect of blood flow occlusion di Sport/Exercise   | 0 |
| 6918 The Effect of Core Stabilization Exer Sport/Exercise   | 0 |
| 6933 The effect of implant modification: T Medicine         | 0 |
| 6943 The Effect of Pedaling Cadence on SI Sport/Exercise    | 0 |
| 6954 The Effect of Screw Design and Corti Medicine          | 0 |
| 7056 The formation of perianchor fluid as Medicine          | 0 |
| 7122 The influence of biological sex and c Sport/Exercise   | 0 |
| 7139 The influence of match phase and fi Sport/Exercise     | 0 |
| 7154 The influence of short-term fixture c Sport/Exercise   | 0 |
| 7192 The Microsurgical Treatment of Lum Medicine            | 0 |
| 7212 The NIH Minimal Dataset for Chroni Sport/Exercise      | 0 |
| 7246 The Ponseti Method Decreased the ! Medicine            | 0 |
| 7285 The Relationship between Dural Oss Medicine            | 0 |
| 7415 The use of medication and alcohol ir Sport/Exercise    | 0 |
| 7450 Thermosensory mapping of skin wet Sport/Exercise       | 0 |
| 7477 Tibial Slope and Its Effect on Graft Fc Medicine       | 0 |
| 7504 Timing of anterior cruciate ligament Medicine          | 0 |
| 7574 Training-monitoring engagement: Ai Sport/Exercise      | 0 |
| 7594 Translation, cross-cultural adaptatio Medicine         | 0 |

|                                                           |   |
|-----------------------------------------------------------|---|
| 7600 Transplantation of Aggregates of Au Medicine         | 0 |
| 7606 Treadmill running using an RPE-clam Sport/Exercise   | 0 |
| 7608 Treatment for frailty does not impro Medicine        | 0 |
| 7637 Trunk exercise training improves mu Sport/Exercise   | 0 |
| 7638 Trunk Muscle Activation in the Back Sport/Exercise   | 0 |
| 7641 Trunk Muscle Endurance, Flexibility, Sport/Exercise  | 0 |
| 7669 Ulnar collateral ligament insufficienc Medicine      | 0 |
| 7718 Unloader knee brace increases medi Medicine          | 0 |
| 7741 Use of a Gaming Platform for Balanc Rehab            | 0 |
| 7745 Use of Human Placenta-Derived Cell Medicine          | 0 |
| 7774 Using tele-health to enhance motiva Rehab            | 0 |
| 7776 Using the single leg squat as an asse Sport/Exercise | 0 |
| 7799 Validation of Simendo Knee Arthros Medicine          | 0 |
| 7806 Validation of the registration accur Medicine        | 0 |
| 7854 Variation in Graft Bending Angle Dur Medicine        | 0 |
| 7898 Visit Duration Does Not Correlate wi Medicine        | 0 |
| 7971 What Is the Effect of Vitamin C on Fi Medicine       | 0 |
| 8077 Working overtime: The effects of ov Sport/Exercise   | 0 |
